# Supplementary material for: Structural insights of the enzymes from the chitin utilization locus of Flavobacterium johnsoniae
Source: PubMed Central journal article supplement (PMC7426924; doi:10.1038/s41598-020-70749-w), 2020-08-13
Supplement: 41598_2020_70749_MOESM1_ESM.pdf [file 41598_2020_70749_MOESM1_ESM.pdf]

## **Structural insights of the enzymes from the Chitin Utilization Locus of *Flavobacterium johnsoniae***

Scott Mazurkewich<sup>a</sup>, Ronny Helland<sup>b</sup>, Alasdair Mackenzie<sup>c</sup>, Vincent G. H. Eijsink<sup>c</sup>, Phillip B. Pope<sup>c,d</sup>, Gisela Brändén<sup>e</sup>, Johan Larsbrink<sup>a\*</sup>

- a) Wallenberg Wood Science Center, Department of Biology and Biological Engineering, Chalmers University of Technology, SE-412 96 Gothenburg, Sweden
- b) Department of Chemistry, Faculty of Science and Technology, UiT - The Arctic University of Norway, NO-9037 Tromsø, Norway
- c) Faculty of Chemistry, Biotechnology and Food Science, Norwegian University of Life Sciences (NMBU), NO-1432 Ås, Norway.
- d) Faculty of Biosciences, Biotechnology and Food Science, Norwegian University of Life Sciences (NMBU), NO-1432 Ås, Norway.
- e) Department of Chemistry and Molecular Biology, University of Gothenburg, SE-405 30 Gothenburg, Sweden

\* Corresponding author: Johan Larsbrink, [johan.larsbrink@chalmers.se](mailto:johan.larsbrink@chalmers.se), +46(0)317723839

**Supplementary figures S1-S3**

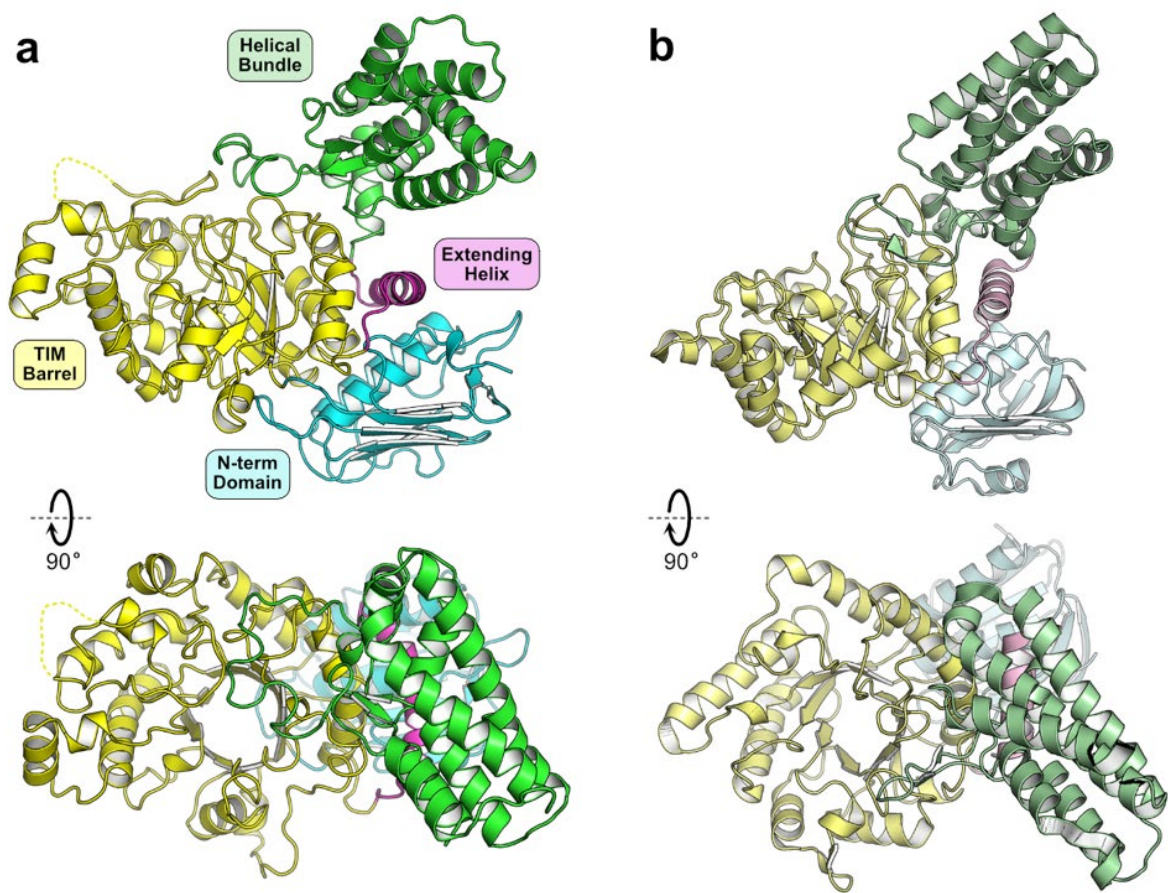

**Supplemental Figure 1.** Comparison of *FjGH20* with the GH84 member NagJ from *Clostridium perfringens*. The structures of *FjGH20* (a) and NagJ (b) are coloured as in Figure 1 except NagJ which is shown with pale colors.

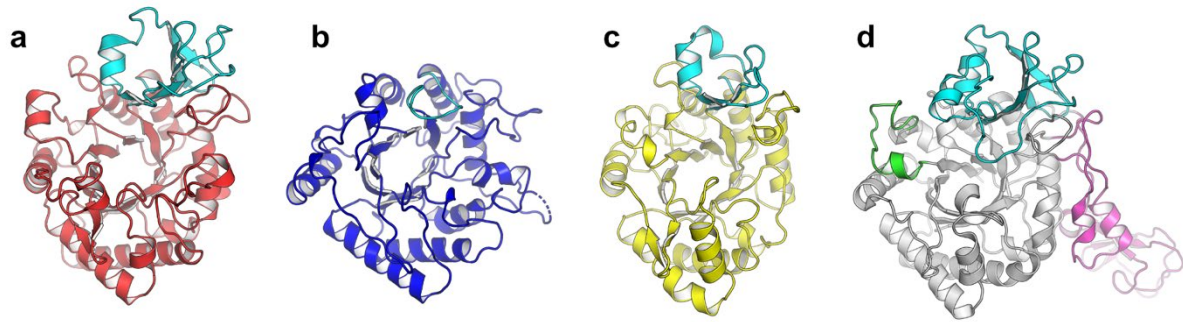

**Supplemental Figure 2.** Homology models of the *FjChiA* GH18 domains. The overall structures of the predicted *FjChiA\_N* (a) and *FjChiA\_C* (c) domains shown alongside the structurally determined *FjChiB* (b) and the *Serratia marcescens* *SmChiB* (d; PDB accession 1e6n). The chitinase insertion domains (CIDs) are colored in cyan and the *SmChiB* domains are colored as in Figure 2. The *FjChiA\_N* (a) and *FjChiA\_C* homology models were created using PHYRE2 (1) and with primary sequences of *FjChiA\_N* and *FjChiA\_C* mapped onto chitinases from *Paenibacillus* sp. str. FPU-7 (PDB accession 5gzt) and *Chromobacterium violaceum* (PDB accession 4tx8), respectively. Regions of the primary sequence unable to be modelled are shown as dashed lines. Note that we use a wide definition of the CID, which implies that all GH18 enzymes have a CID that varies drastically in size; previous studies have employed a narrower definition leading to the conclusion that enzymes such as *SmChiC*, and by analogy *FjChiA\_C*, lack a CID.



## References

1. Kelley, L. A., Mezulis, S., Yates, C. M., Wass, M. N., and Sternberg, M. J. (2015) The Phyre2 web portal for protein modeling, prediction and analysis. *Nat Protoc* **10**, 845-858
2. Madeira, F., Park, Y. M., Lee, J., Buso, N., Gur, T., Madhusoodanan, N., Basutkar, P., Tivey, A. R. N., Potter, S. C., Finn, R. D., and Lopez, R. (2019) The EMBL-EBI search and sequence analysis tools APIs in 2019. *Nucleic Acids Res* **47**, W636-W641
3. Robert, X., and Gouet, P. (2014) Deciphering key features in protein structures with the new ENDscript server. *Nucleic Acids Res* **42**, W320-324
